# Supplementary material
Source: HighWire-hosted journal article supplement (https://svn.bmj.com/content/svn-2023-002813)
Supplement: inline-supplementary-material-2 [file inline-supplementary-material-2.pdf]

**A Combined data from Switzerland and Norway**

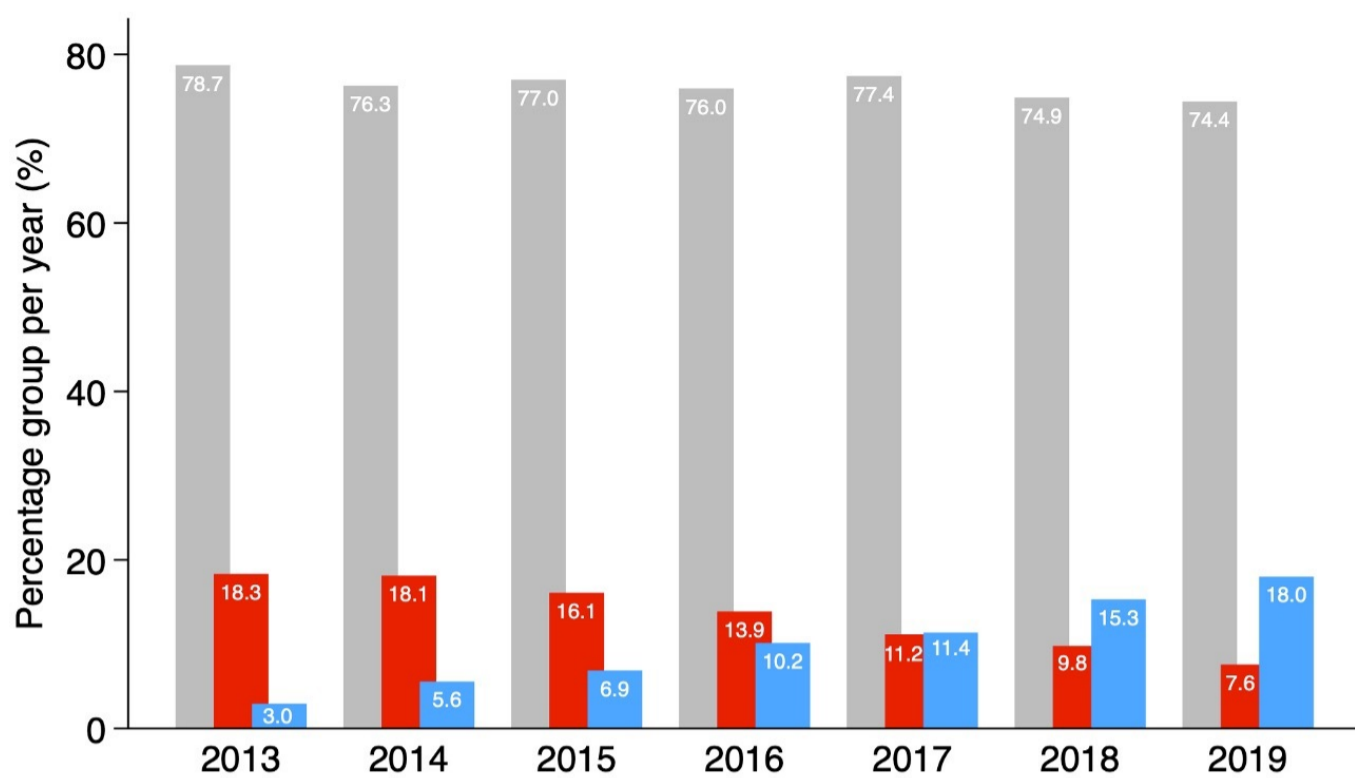

**B Switzerland**

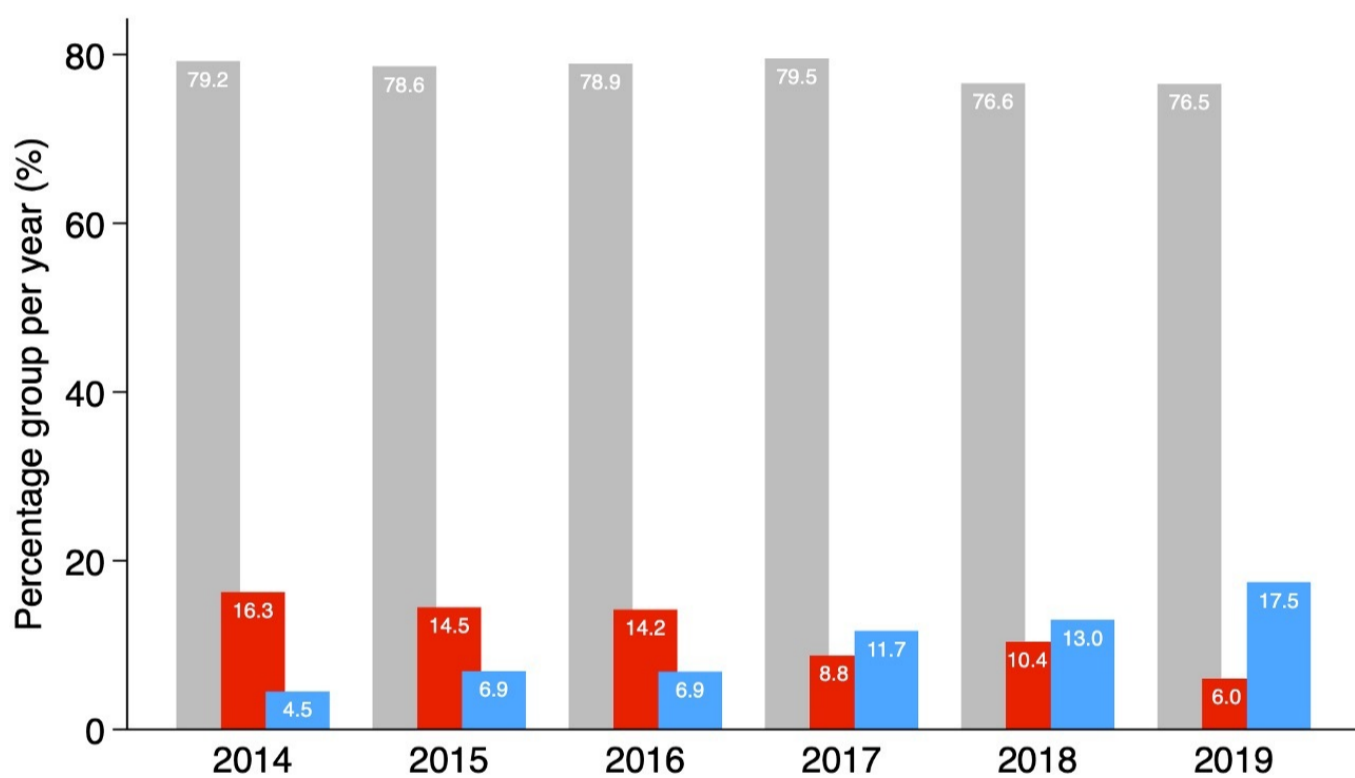

**C Norway**

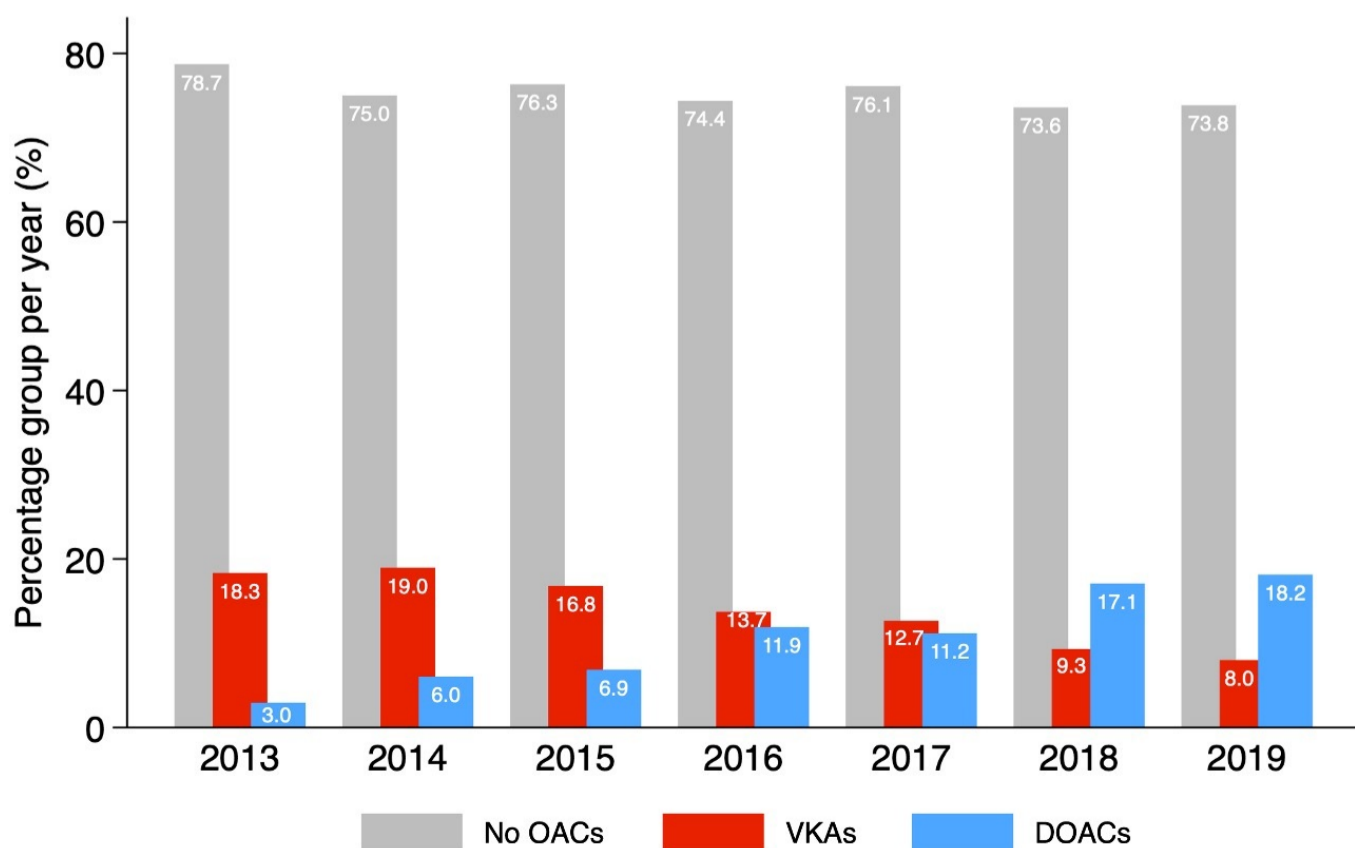

Legend: No OACs (grey), VKAs (red), DOACs (blue)
