# Supplementary material
Source: HighWire-hosted journal article supplement (https://svn.bmj.com/content/svn-2023-002813)

### A Combined data from Switzerland and Norway

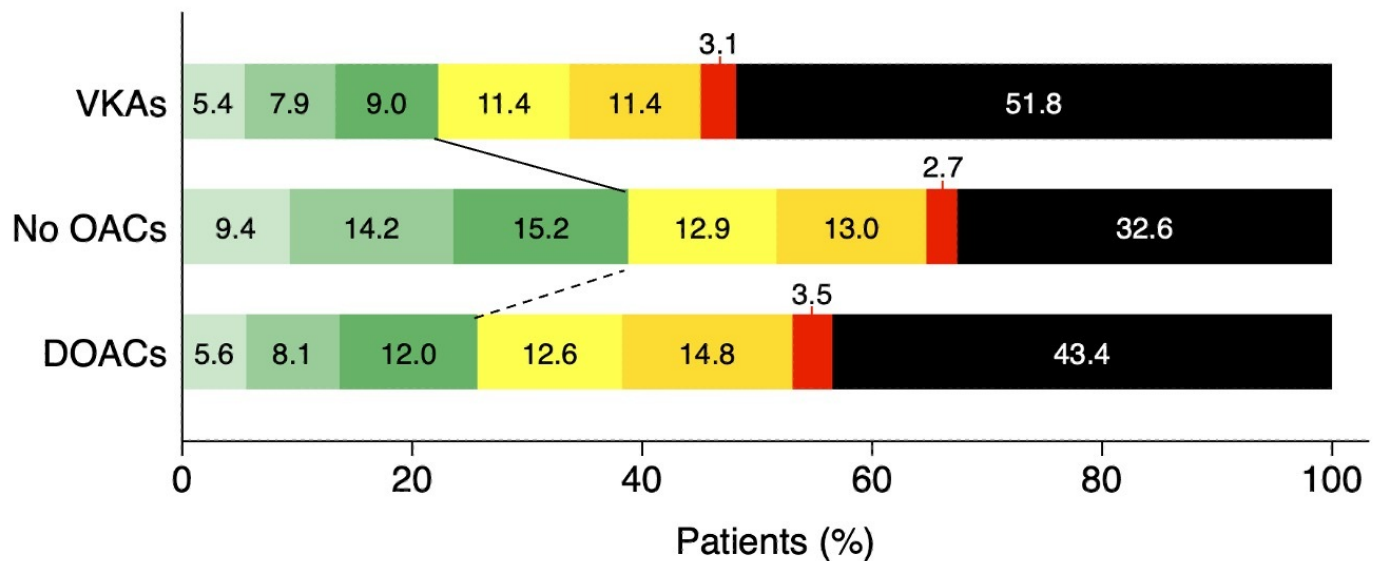

### B Switzerland

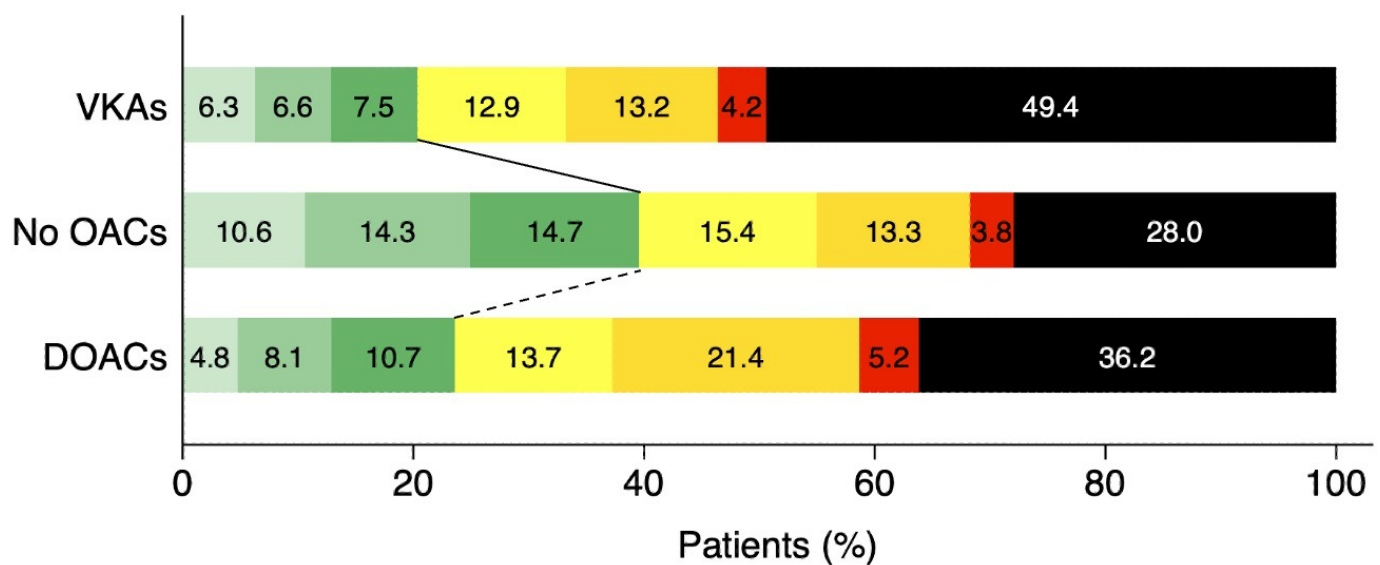

### C Norway

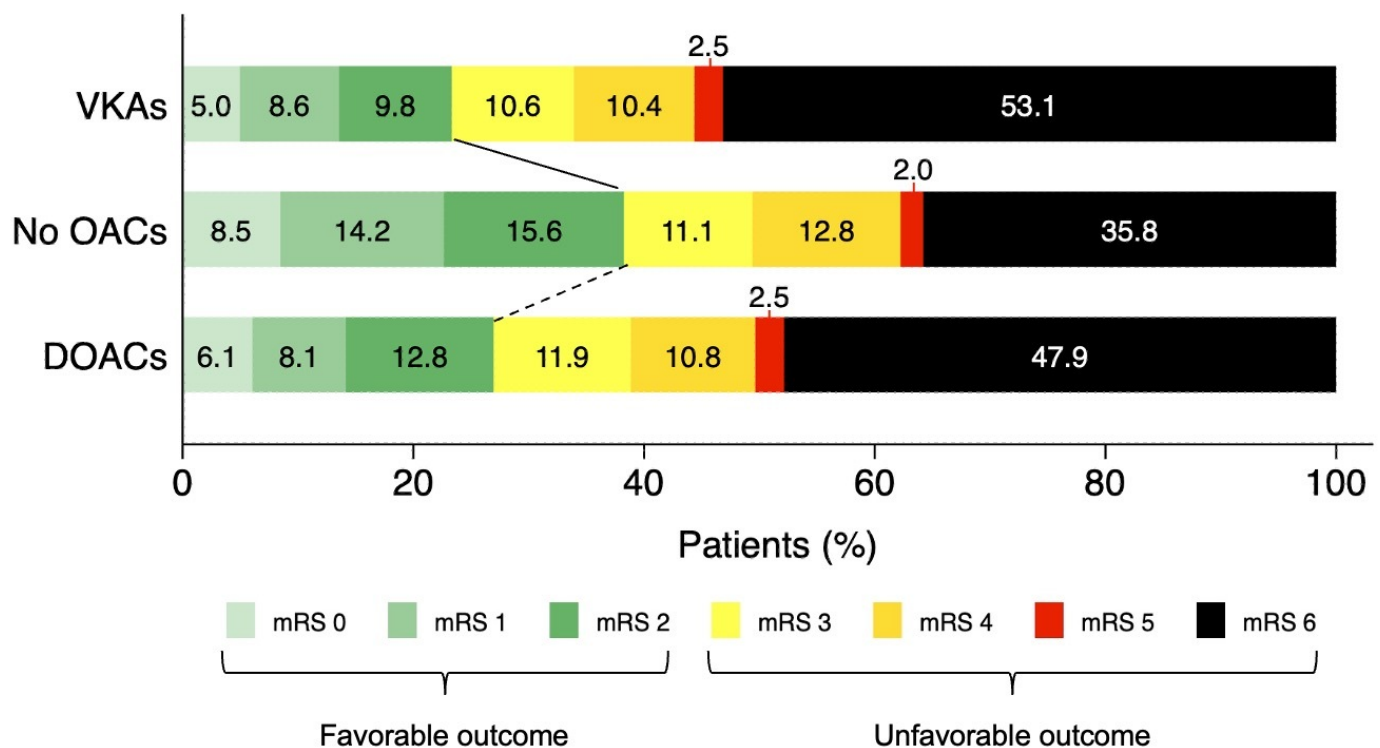

Supplement: inline-supplementary-material-3 [file inline-supplementary-material-3.pdf]
